## CORRECTION

# Correction: Single cell analysis of adult mouse skeletal muscle stem cells in homeostatic and regenerative conditions (doi: 10.1242/dev.174177)

**Stefania Dell’Orso, Aster H. Juan, Kyung-Dae Ko, Faiza Naz, Jelena Perovanovic, Gustavo Gutierrez-Cruz, Xuesong Feng and Vittorio Sartorelli**

There was an error published in *Development* (2019) **146**, dev174177 (doi:10.1242/dev.174177).

On p. 6, the definition of TA was given incorrectly.

### **Corrected:**

Tibialis anterior (TA) and extensor digitorum longus (EDL) muscles of two 3-month-old C56BL/6J mice were injured with the myotoxic agent notexin and MuSCs were FACS-isolated 60 h after injury (Fig. 4A, Fig. S3B).

### **Original:**

Transverse abdominal (TA) and extensor digitorum longus (EDL) muscles of two 3-month-old C56BL/6J mice were injured with the myotoxic agent notexin and MuSCs were FACS-isolated 60 h after injury (Fig. 4A, Fig. S3B).

Both the online full-text and PDF versions have been updated.

The authors apologise for this error and any inconvenience it may have caused.
